# Supplementary material for: ASPP1 and ASPP2 bind active RAS, potentiate RAS signalling and enhance p53 activity in cancer cells
Source: PubMed Central journal article supplement — Cell Death Differ. 2013 Feb 8;20(4):525–34. doi: 10.1038/cdd.2013.3 (PMC3595493; doi:10.1038/cdd.2013.3), 2013-02-08

Figure S1

**a**

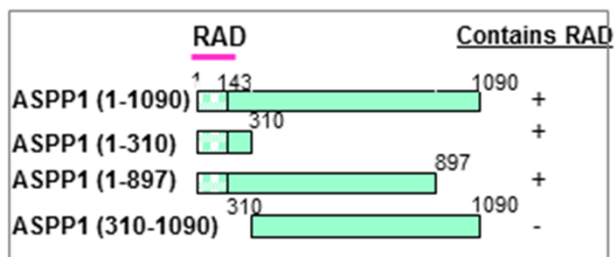

**b**

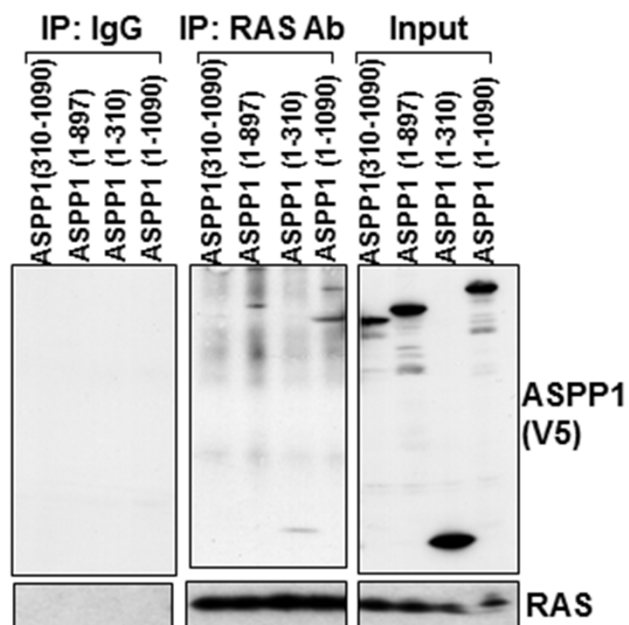

**c**

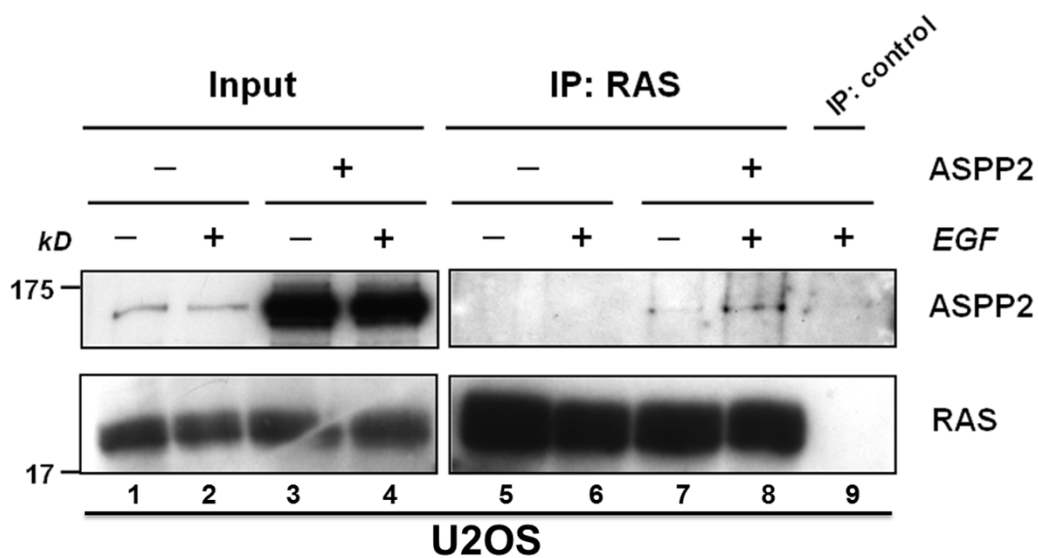



Figure S3

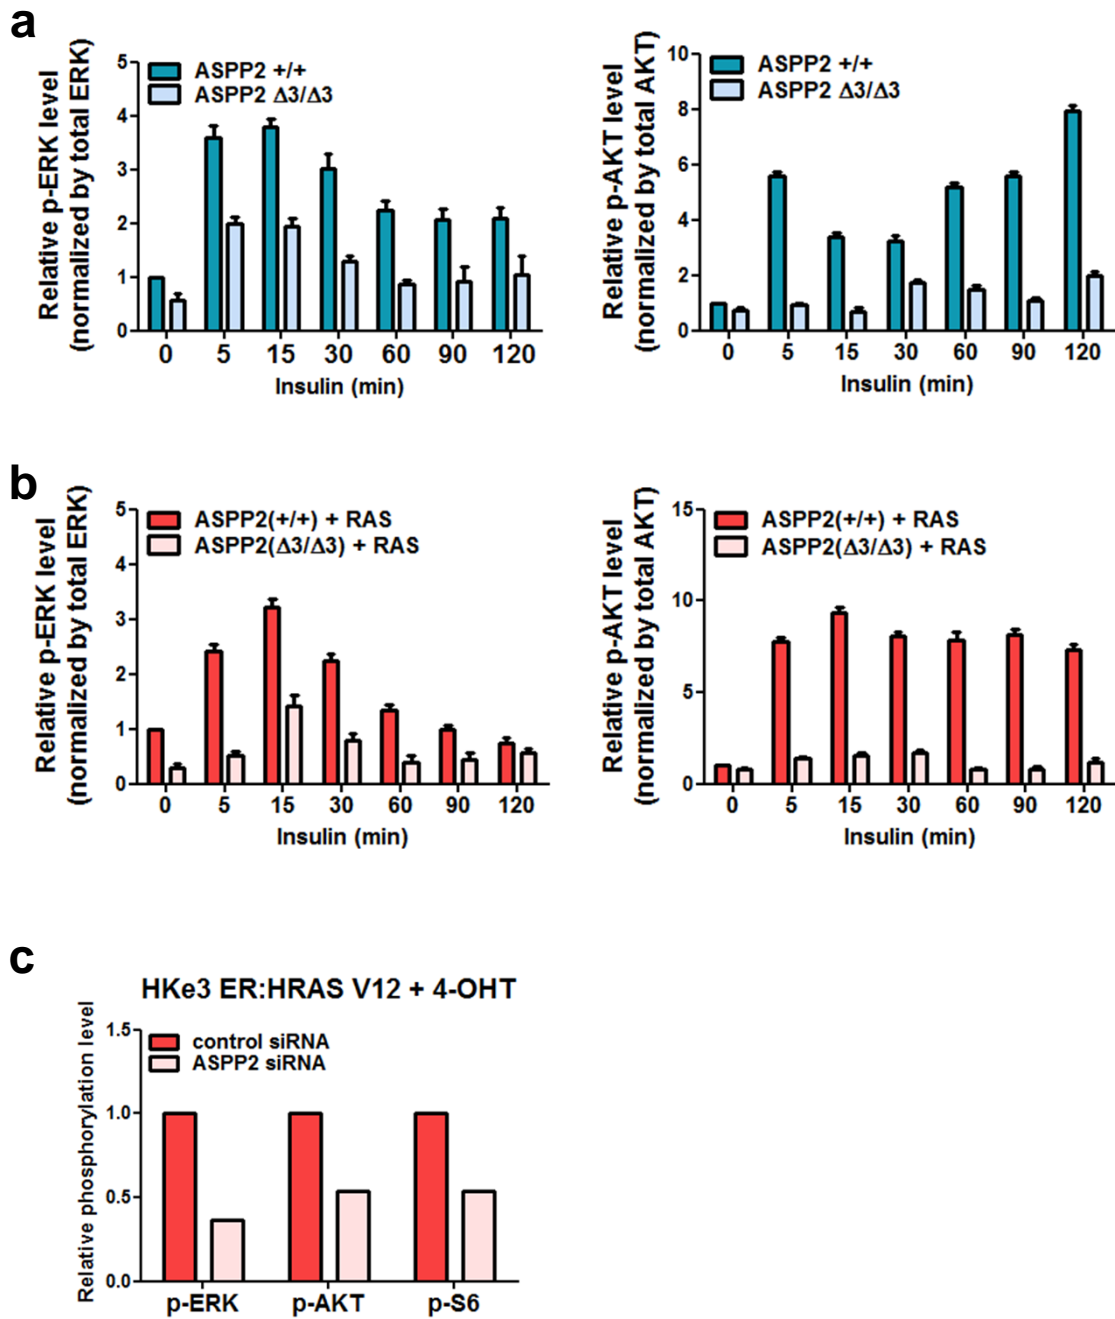

Figure S3 continued

d

control |  control siRNA  
          |  siRNA ASPP2  
  
4-OHT |  control siRNA  
          |  siRNA ASPP2

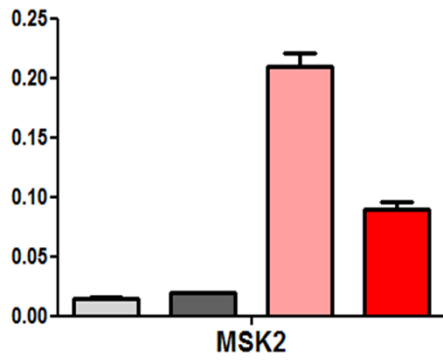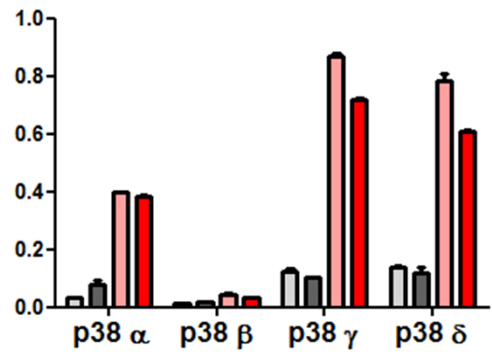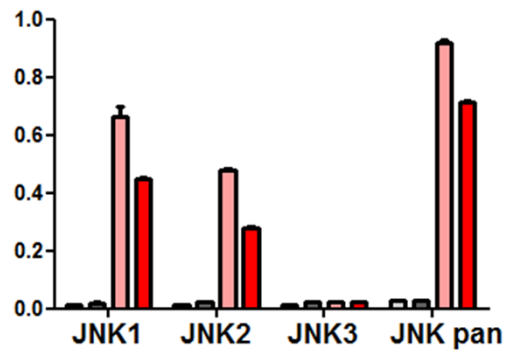

Figure S4

a

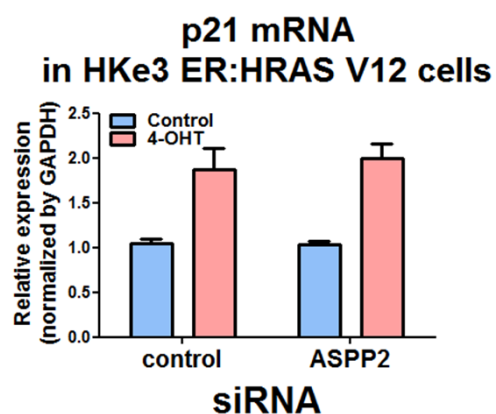

b

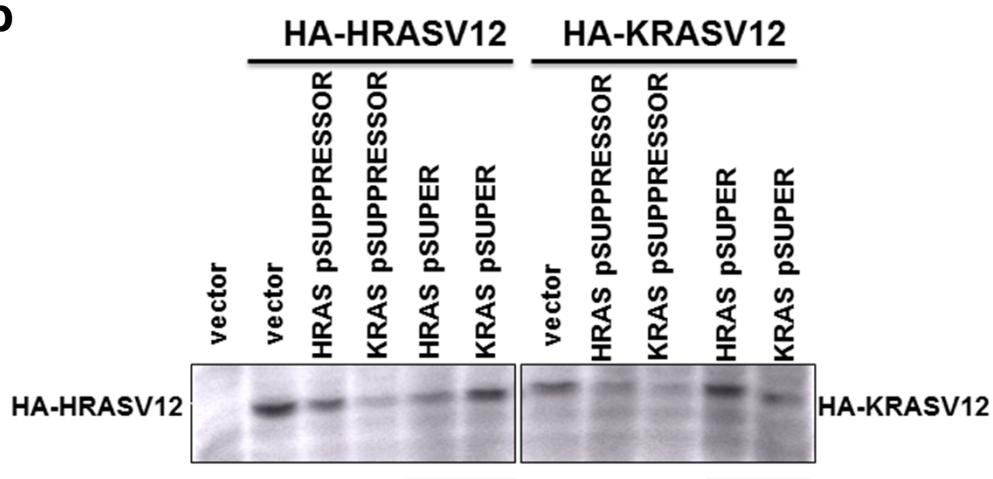

c

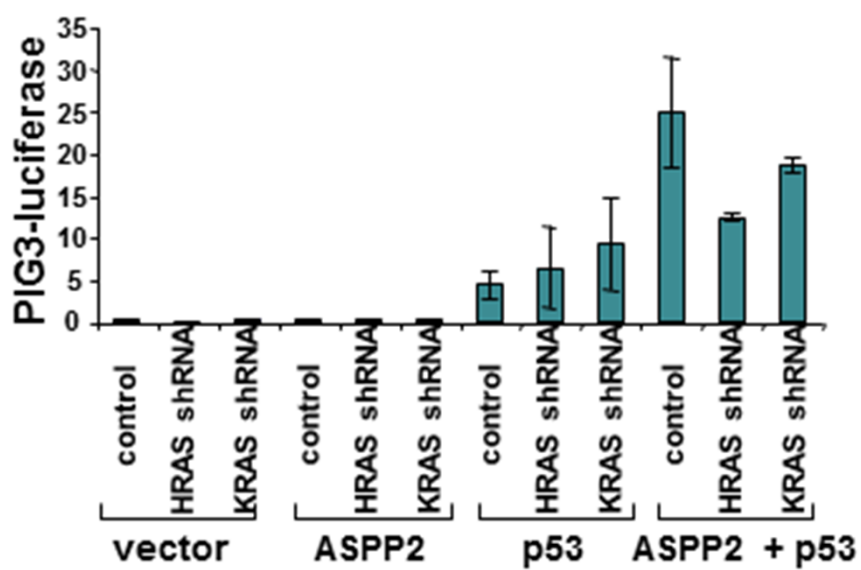

Supplement: cdd20133x1.pdf [file cdd20133x1.pdf]
